# Supplementary material
Source: publisher site journal article supplement (https://www.spandidos-publications.com/5117/downloadSupplementary)
Supplement: Supplementary file 2 [file downloadSupplementary]

## Sheet: Table S20
Table SXX. The correlation of DNase genes expression and DNAss.
Cancer type	DNASE1	DNASE1L1	DNASE1L2	DNASE1L3	DNASE2	DNASE2B
ACC	0.12356	0.0833976	-0.142427	0.0726995	0.250294	-0.0265126
BLCA	0.13133	-0.00970499	0.243121	-0.258917	-0.0725954	-0.0565283
BRCA	0.0384533	0.0906193	0.0934699	-0.161808	0.0722885	-0.095478
CESC	-0.030602	0.135214	-0.0125384	0.187747	-0.0548169	0.090144
CHOL	-0.273874	0.0131274	-0.250193	0.210553	-0.242471	0.120214
COAD	0.0786954	0.205944	0.13146	-0.0414953	-0.0417606	0.00758527
DLBC	0.0383196	0.0326748	0.422384	-0.53528	-0.287343	-0.421467
ESCA	-0.0744199	0.0284132	0.140516	-0.123641	-0.0431501	-0.0570396
GBM	0.371352	-0.270593	0.310676	-0.0346599	-0.284466	0.133209
HNSC	0.187843	-0.048905	0.173692	-0.0456322	0.141843	-0.0881199
KICH	0.18022	0.212271	0.132326	-0.352885	0.141255	-0.32852
KIRC	0.0163756	0.00537767	0.0170989	0.0536495	-0.138563	-0.134639
KIRP	0.0958242	-0.0110561	0.0586605	0.0968265	0.0453361	-0.0471581
LAML	-0.185365	0.0211337	-0.404517	0.13223	0.122797	0.043495
LGG	-0.0681163	0.26781	-0.16753	-0.130698	0.132693	0.119846
LIHC	-0.0744306	-0.0469081	0.174823	-0.0616182	0.281618	0.0959544
LUAD	0.133479	-0.0508797	0.141584	-0.139945	-0.205341	-0.148873
LUSC	0.0848905	-0.167381	0.0401969	-0.0845375	-0.0516658	-0.219079
MESO	0.0819756	0.139091	-0.105052	-0.0694942	0.131638	0.00888406
OV	-0.571429	0.428571	0.464286	-0.0357143	0.0714286	-0.214286
PAAD	-0.0203822	0.119559	0.0555041	-0.162804	0.0224463	-0.113321
PCPG	0.184805	0.179725	0.174826	-0.0882236	0.216113	0.370076
PRAD	0.0355801	0.0539587	0.142076	0.148725	0.204751	-0.180479
READ	0.149153	0.0180689	0.108767	0.0884514	-0.079146	-0.0933603
SARC	0.00457025	-0.0322489	0.230571	-0.299779	-0.0205041	-0.0925051
SKCM	0.00289002	0.158843	0.0662153	-0.139188	0.0356429	0.0605435
STAD	0.15913	0.00873631	0.0709588	-0.135786	-0.114331	-0.0939854
TGCT	-0.365805	-0.672382	-0.17983	0.435058	-0.15656	0.201465
THCA	-0.0461539	-0.0664941	-0.00833906	-0.215076	-0.307401	0.178299
THYM	-0.371635	0.42061	-0.195229	-0.253582	0.529547	-0.119409
UCEC	0.140929	-0.120935	0.107722	0.0430427	0.0374284	-0.0622583
UCS	0.209364	-0.0506494	0.446822	-0.109843	0.0110731	0.0234971
UVM	0.0419362	0.357056	0.168171	0.176371	0.388959	0.143044
